# Supplementary material for: Vms1 and ANKZF1 peptidyl-tRNA hydrolases release nascent chains from stalled ribosomes
Source: Springer Nature journal article supplement (doi:10.1038/s41586-018-0022-5), 2018-04-09
Supplement: MOESM3 [file 41586_2018_22_MOESM3_ESM.xlsx]

## Sheet: Fig 4a CTAB Pellets Dosage VMS1
Fig. 4a - Quantification
	Raw Data		PrANS-tRNA
			Intensity Units	% of Minus
		Minus	5513.4	100
	His6-VMS1	250	4468.98	81.0568
		500	2409.43	43.7013
		1000	3131.45	56.7971
		500	4044.45	73.3567
	His6-VMS1 Q295L	250	5890.76	106.844
		500	6079.23	110.263
		1000	6679.05	121.142
	Dosage (nM)	PrANS-tRNA + WT %		PrANS-tRNA + Q295L %
	0	100		100
	250	81.0568		106.844
	500	43.7013	73.3567	110.263
	1000	56.7971		121.142

## Sheet:  Fig. 4b,c Time Course VMS1
Replicate 1 - Quantification (corresponding to Fig. 4b,c)
	Time (min)	CRPNSpA-tRNA + WT	CRPNSpA - WT	Total		Time (min)	CRPNSpA-tRNA + Q295L	CRPNSpA - Q295L	Total
		Intensitiy Units	Intensitiy Units	Intensitiy Units			Intensitiy Units	Intensitiy Units	Intensitiy Units
	0	558	355	913		0	535	400	935
	3	416	528	944		3	546	403	949
	5	386	579	965		5	502	417	919
	10	320	680	1000		10	469	435	904
	15	288	713	1001		15	492	464	956
	30	246	831	1077		30	424	514	938
						30	421	456	877	No Addition
	Time (min)	% Total CRPNSpA-tRNA + WT	% Total CRPNSpA + WT			Time (min)	% Total CRPNSpA-tRNA + Q295L	% Total CRPNSpA - Q295L
	0	0.611172	0.388828			0	0.572193	0.427807
	3	0.440678	0.559322			3	0.575342	0.424658
	5	0.4	0.6			5	0.546246	0.453754
	10	0.32	0.68			10	0.518805	0.481195
	15	0.287712	0.712288			15	0.514644	0.485356
	30	0.228412	0.771588			30	0.452026	0.547974
						30	0.480046	0.519954	No Addition
Replicate 2 - Quantification (corresponding to Fig. 4b,c)
Replicate 2	Time (min)	CRPNSpA-tRNA + WT	CRPNSpA - WT	Total		Time (min)	CRPNSpA-tRNA + Q295L	CRPNSpA - Q295L	Total
		Intensitiy Units	Intensitiy Units	Intensitiy Units			Intensitiy Units	Intensitiy Units	Intensitiy Units
	0	778	305	1083		0	667	410	1077
	3	560	486	1046		3	632	446	1078
	5	492	579	1071		5	632	478	1110
	10	440	673	1113		10	648	503	1151
	15	385	783	1168		15	647	506	1153
	30	288	906	1194		30	678	634	1312
	30						678	561	1239	No Addition
	Time (min)	% Total CRPNSpA-tRNA + WT	% Total CRPNSpA + WT			Time (min)	% Total CRPNSpA-tRNA + Q295L	% Total CRPNSpA - Q295L
	0	0.718375	0.281625			0	0.619313	0.380687
	3	0.535373	0.464627			3	0.586271	0.413729
	5	0.459384	0.540616			5	0.569369	0.430631
	10	0.395328	0.604672			10	0.562989	0.437011
	15	0.329623	0.670377			15	0.561145	0.438855
	30	0.241206	0.758794			30	0.516768	0.483232
						30	0.547215	0.452785	No Addition
>> Plotted are only data points for CRPNS-tRNA <<
